# Supplementary material for: In Silico Prediction of Cytochrome P450-Drug Interaction: QSARs for CYP3A4 and CYP2C9
Source: PubMed Central journal article supplement (PMC4926447; doi:10.3390/ijms17060914), 2016-06-09
Supplement: ijms-17-00914-s001.pdf [file ijms-17-00914-s001.pdf]

# Supplementary Materials: *In Silico* Prediction of Cytochrome P450-Drug Interaction: QSARs for CYP3A4 and CYP2C9

Serena Nembri, Francesca Grisoni, Viviana Consonni and Roberto Todeschini

## 1. Setting for Calculating the Extended Connectivity Fingerprints (ECFP)

**Table S1.** Settings used for calculation of the Extended Connectivity Fingerprints: size, bits per pattern, minimum and maximum length of fragments and atom features taken into account.

| Size | Bits Per Pattern | Minimum Length | Maximum Length | Atom Options                                                      |
|------|------------------|----------------|----------------|-------------------------------------------------------------------|
| 1024 | 2                | 0              | 6              | Atom type, Aromaticity, Connectivity (total), Charge, Bond order. |

## 2. Classification and Regression Trees (CART), Models Calibration Settings

**Table S2.** Settings used for the Classification and Regression Trees (CART) models calibration for both the isoforms: object/leaf ratio, cost matrix and splitting criterion. CYP: Cytochromes P450.

| CYP Isoform | Object/Leaf Ratio | Cost Matrix      | Splitting Criterion  |
|-------------|-------------------|------------------|----------------------|
| 3A4         | 210               | [0 0; 0 0]       | Gini diversity index |
| 2C9         | 210               | [0 0.35; 0.65 0] | Gini diversity index |

## 3. Applicability Domain Cart Models

**Table S3.** For each isoform, the minimum and the maximum values assumed by each Molecular Descriptors are reported included in the CART model. MDs: molecular descriptors.

| CYP Isoform | MD                  | Range |        |
|-------------|---------------------|-------|--------|
|             |                     | min   | max    |
| 3A4         | <i>nBO</i>          | 3     | 93     |
|             | <i>nBM</i>          | 0     | 66     |
|             | <i>nROH</i>         | 0     | 12     |
| 2C9         | <i>Sp</i>           | 8.960 | 90.318 |
|             | <i>nBM</i>          | 0     | 66     |
|             | <i>ARR</i>          | 0     | 0.963  |
|             | <i>nPyrimidines</i> | 0     | 2      |

## 4. Modelling Methods Tested

Table S4 shows the best model for each of the classification methods tested: CART, *k*-Nearest Neighbours (*k*-NN), Linear Discriminant Analysis (LDA), *N*-Nearest Neighbors (N3) and Binned Nearest Neighbors (BNN).

**Table S4.** Model statistics for both the isoforms. Models are described according to the method, number of variables ( $p$ ) and classification parameters (object/leaf ratio for CART,  $k$  for  $k$ -Nearest Neighbours ( $k$ -NN), latent variable for LDA and  $\alpha$  for N3 and BNN). For each model, the Non-Error Rate ( $NER$ ), the Sensitivity ( $Sn$ ), and the Specificity ( $Sp$ ) are reported in fitting, cross-validation and on the test set. ECFP: extended connectivity fingerprints.

| CYP Isoform | Mod.    | Descriptors | $p$  | Parameters | Fitting |      |      | CV    |      |      | Test  |      |      |
|-------------|---------|-------------|------|------------|---------|------|------|-------|------|------|-------|------|------|
|             |         |             |      |            | $NER$   | $Sn$ | $Sp$ | $NER$ | $Sn$ | $Sp$ | $NER$ | $Sn$ | $Sp$ |
| 3A4         | CART    | MD          | 3    | 210        | 0.74    | 0.74 | 0.75 | 0.74  | 0.73 | 0.75 | 0.75  | 0.74 | 0.76 |
|             | $k$ -NN | MD          | 6    | 14         | 0.76    | 0.73 | 0.79 | 0.76  | 0.73 | 0.78 | 0.77  | 0.75 | 0.79 |
|             | N3      | ECFP        | 1024 | 1          | 0.79    | 0.88 | 0.71 | 0.79  | 0.87 | 0.70 | 0.78  | 0.86 | 0.71 |
|             | LDA     | MD          | 4    | 2          | 0.76    | 0.66 | 0.85 | 0.76  | 0.67 | 0.86 | 0.77  | 0.67 | 0.86 |
|             | $k$ -NN | ECFP        | 1024 | 10         | 0.78    | 0.85 | 0.72 | 0.78  | 0.84 | 0.73 | 0.77  | 0.83 | 0.71 |
|             | BNN     | ECFP        | 1024 | 0.35       | 0.79    | 0.80 | 0.78 | 0.79  | 0.80 | 0.78 | 0.77  | 0.78 | 0.77 |
| 2C9         | CART    | MD          | 4    | 210        | 0.75    | 0.75 | 0.75 | 0.75  | 0.75 | 0.75 | 0.75  | 0.75 | 0.74 |
|             | $k$ -NN | MD          | 6    | 14         | 0.77    | 0.69 | 0.85 | 0.77  | 0.68 | 0.85 | 0.76  | 0.67 | 0.86 |
|             | N3      | ECFP        | 1024 | 1          | 0.80    | 0.87 | 0.73 | 0.80  | 0.86 | 0.73 | 0.78  | 0.83 | 0.73 |
|             | LDA     | MD          | 6    | 2          | 0.72    | 0.71 | 0.73 | 0.76  | 0.75 | 0.76 | 0.73  | 0.71 | 0.75 |
|             | $k$ -NN | ECFP        | 1024 | 6          | 0.76    | 0.89 | 0.63 | 0.76  | 0.88 | 0.63 | 0.73  | 0.87 | 0.59 |
|             | BNN     | ECFP        | 1024 | 1.15       | 0.77    | 0.87 | 0.66 | 0.77  | 0.87 | 0.66 | 0.75  | 0.86 | 0.64 |

## 5. Principal Component Analysis (PC1/PC3)

### 5.1. CYP3A4

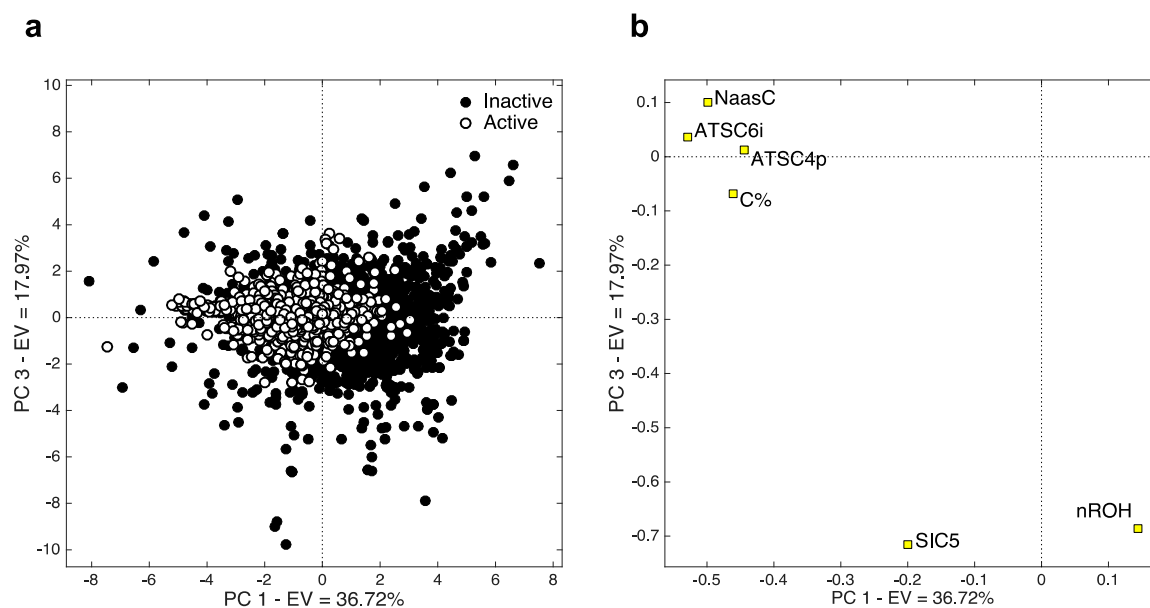

**Figure S1.** PCA based on PC1 and PC3 for CYP3A4: (a) Score plot of the training molecules described by the *k*-Nearest Neighbours (*k*-NN) descriptors, coloured according to their activity; (b) Loading plot of the *k*-NN descriptors.

### 5.2. CYP2C9

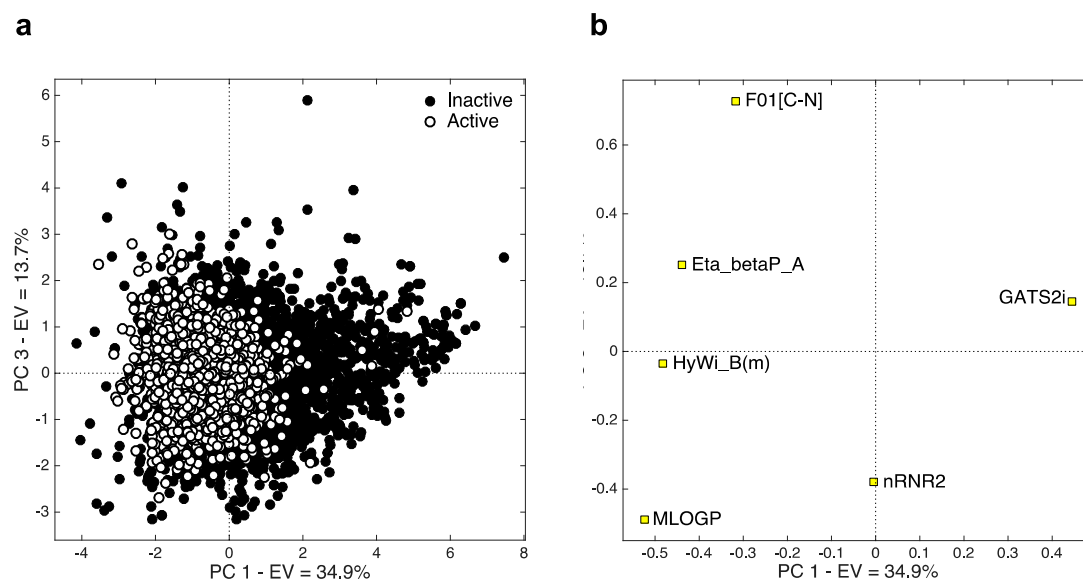

**Figure S2.** PCA based on PC1 and PC3 for CYP2C9: (a) Score plot of the training molecules described by the *k*-NN descriptors, coloured according to their activity; (b) Loading plot of the *k*-NN descriptors.
